# Supplementary material
Source: PubMed Central journal article supplement (PMC4725272)
Supplement: AEM.03103-15_zam999116877so1.pdf [file AEM.03103-15_zam999116877so1.pdf]

TABLE S1 Sampling pattern in ham production plants

| <b>ID</b> | <b>Description</b>                | <b>Surface</b> | <b>Surface Category</b> | <b>Department</b> |
|-----------|-----------------------------------|----------------|-------------------------|-------------------|
| 1         | Cart                              | C              | Equipment               | Shipment          |
| 2         | Container                         | C              | Equipment               | Shipment          |
| 3         | Stainless steel table (handling)  | C              | Equipment               | Shipment          |
| 4         | Teflon table (handling)           | C              | Equipment               | Shipment          |
| 5         | Scale                             | C              | Equipment               | Shipment          |
| 6         | Glove                             | C              | Operator                | Shipment          |
| 7         | Boots/shoe covers                 | NC             | Operator                | Shipment          |
| 8         | Roller conveyer                   | NC             | Equipment               | Shipment          |
| 9         | Drain                             | NC             | Floor and drainage      | Washing           |
| 10        | Basin                             | C              | Equipment               | Salting           |
| 11        | Scraper scoop                     | C              | Equipment               | Salting           |
| 12        | Stainless steel glove             | C              | Operator                | Salting           |
| 13        | Apron                             | C              | Operator                | Salting           |
| 14        | Massager                          | C              | Equipment               | Salting           |
| 15        | Handle                            | NC             | Equipment               | Salting           |
| 16        | Drain                             | NC             | Floor and drainage      | Salting           |
| 17        | Floor                             | NC             | Floor and drainage      | Salting           |
| 19        | Storage room                      | NC             | Equipment               | Salting           |
| 20        | Wet salter conveyer               | NC             | Equipment               | Salting           |
| 21        | Teflon table (handling/packaging) | C              | Equipment               | Washing           |
| 22        | Dashboard                         | NC             | Equipment               | Washing           |

TABLE S2 Sampling pattern in post-production processing plants

| <b>ID</b> | <b>Description</b>                     | <b>Surface</b> | <b>Surface Category</b> | <b>Department</b> |
|-----------|----------------------------------------|----------------|-------------------------|-------------------|
| 1         | Basin                                  | C              | Equipment               | Receipt           |
| 2         | Container                              | C              | Equipment               | Processing        |
| 3         | Dashboard                              | NC             | Equipment               | Processing        |
| 4         | Stainless steel table (handling)       | C              | Equipment               | Processing        |
| 5         | Teflon table (handling)                | C              | Equipment               | Processing        |
| 7         | Container <sup>\$</sup>                | C              | Equipment               | Processing        |
| 8         | Drain                                  | NC             | Floor and drainage      | Receipt           |
| 9         | Floor under roller conveyor            | NC             | Floor and drainage      | Processing        |
| 10        | Drain                                  | NC             | Floor and drainage      | Processing        |
| 11        | Floor                                  | NC             | Floor and drainage      | Receipt           |
| 12        | Stainless steel glove                  | C              | Operator                | Processing        |
| 13        | Glove                                  | C              | Operator                | Processing        |
| 14        | Apron                                  | C              | Operator                | Processing        |
| 15        | Boots/shoe covers                      | NC             | Operator                | Processing        |
| 16        | De-boning/Gouging machine <sup>#</sup> | C              | Equipment               | Processing        |
| 17        | Slicing machine <sup>\$</sup>          | C              | Equipment               | Processing        |
| 18        | Roller conveyor                        | NC             | Equipment               | Processing        |
| 19        | Ham washer                             | NC             | Equipment               | Processing        |

<sup>\$</sup> Present in slicing plants only

<sup>#</sup> Present in de-boning plants only

TABLE S3 Accession numbers and statistics of whole genome sequences generated in the study

| <b>Study ID</b> | <b>BioSample ID</b> | <b>Contig Accession Number</b> | <b>Coverage</b> | <b>Large contig<sup>a</sup></b> | <b>Total size of contigs (bp)</b> |
|-----------------|---------------------|--------------------------------|-----------------|---------------------------------|-----------------------------------|
| LM1             | ERS762129           | CWKV01000001-CWKV01000052      | 135,09          | 52                              | 3000380                           |
| LM2             | ERS762130           | CWKZ01000001-CWKZ01000116      | 156,06          | 116                             | 3050975                           |
| LM3             | ERS762131           | CWLX01000001-CWLX01000153      | 141,58          | 153                             | 3042612                           |
| LM4             | ERS762132           | CWVG01000001-CWVG01000122      | 115,78          | 122                             | 3057832                           |
| LM5             | ERS762133           | CWLK01000001-CWLK01000060      | 81,06           | 60                              | 3032402                           |
| LM6             | ERS762134           | CWLU01000001-CWLU01000115      | 189,68          | 115                             | 3012433                           |
| LM7             | ERS762135           | CWME01000001-CWME01000117      | 142,99          | 117                             | 3051611                           |
| LM8             | ERS762136           | CWKP01000001-CWKP01000115      | 300,2           | 115                             | 3133872                           |
| LM9             | ERS762137           | CWLT01000001-CWLT01000047      | 99,02           | 47                              | 3074656                           |
| LM10            | ERS762138           | CWLP01000001-CWLP01000056      | 168,26          | 56                              | 3030389                           |
| LM11            | ERS762139           | CWKQ01000001-CWKQ01000033      | 145,54          | 33                              | 2997187                           |
| LM12            | ERS762140           | CWLB01000001-CWLB01000143      | 208,3           | 143                             | 3074170                           |
| LM13            | ERS762141           | CWLW01000001-CWLW01000085      | 126,67          | 85                              | 2974013                           |
| LM14            | ERS762142           | CWKY01000001-CWKY01000061      | 127,76          | 61                              | 2981537                           |
| LM15            | ERS762143           | CWLS01000001-CWLS01000174      | 175,14          | 174                             | 3137838                           |
| LM16            | ERS762144           | CWKU01000001-CWKU01000173      | 188,31          | 173                             | 3036358                           |
| LM17            | ERS762145           | CWKW01000001-CWKW01000112      | 155,3           | 112                             | 3127403                           |
| LM18            | ERS762146           | CWMD01000001-CWMD01000154      | 129,64          | 154                             | 3114435                           |
| LM19            | ERS762147           | CWMB01000001-CWMB01000102      | 152,71          | 102                             | 3112206                           |
| LM20            | ERS762148           | CWLY01000001-CWLY01000075      | 222,74          | 75                              | 3134645                           |
| LM21            | ERS762149           | CWKT01000001-CWKT01000076      | 162,46          | 76                              | 3022856                           |
| LM22            | ERS762150           | CWLI01000001-CWLI01000112      | 125,33          | 112                             | 3059840                           |
| LM23            | ERS762151           | CWLE01000001-CWLE01000131      | 158,25          | 131                             | 3156776                           |
| LM24            | ERS762152           | CWLH01000001-CWLH01000173      | 153,73          | 173                             | 3259265                           |
| LM25            | ERS762153           | CWLV01000001-CWLV01000132      | 231,5           | 132                             | 3149496                           |
| LM26            | ERS762154           | CWLO01000001-CWLO01000105      | 186,02          | 105                             | 3084148                           |
| LM27            | ERS762155           | CWMI01000001-CWMI01000066      | 230,46          | 66                              | 3049048                           |
| LM28            | ERS762156           | CWMC01000001-CWMC01000075      | 205,52          | 75                              | 3153742                           |

|      |           |                           |        |     |         |
|------|-----------|---------------------------|--------|-----|---------|
| LM29 | ERS762157 | CWLL01000001-CWLL01000053 | 163,94 | 53  | 3133347 |
| LM30 | ERS762158 | CWMA01000001-CWMA01000202 | 175,21 | 202 | 3184538 |
| LM31 | ERS762159 | CWMJ01000001-CWMJ01000274 | 161,14 | 274 | 3216898 |
| LM32 | ERS762160 | CWKM01000001-CWKM01000056 | 209,69 | 56  | 3137912 |
| LM33 | ERS762161 | CWLR01000001-CWLR01000052 | 164,89 | 52  | 3070496 |
| LM34 | ERS762162 | CWLD01000001-CWLD01000066 | 149,31 | 66  | 3117989 |
| LM35 | ERS762163 | CWLJ01000001-CWLJ01000086 | 151,47 | 86  | 3032388 |
| LM36 | ERS762164 | CWKN01000001-CWKN01000043 | 180,93 | 43  | 2995455 |
| LM37 | ERS762165 | CWMF01000001-CWMF01000079 | 161,54 | 79  | 3149478 |
| LM38 | ERS762166 | CWKS01000001-CWKS01000057 | 276,14 | 57  | 3044113 |
| LM39 | ERS762167 | CWKX01000001-CWKX01000081 | 243,4  | 81  | 3164276 |
| LM40 | ERS762168 | CWLA01000001-CWLA01000069 | 166,51 | 69  | 3043550 |
| LM41 | ERS762169 | CWLQ01000001-CWLQ01000068 | 191,02 | 68  | 3079775 |
| LM42 | ERS762170 | CWLG01000001-CWLG01000031 | 140,64 | 31  | 3016198 |
| LM43 | ERS762171 | CWKR01000001-CWKR01000080 | 94,02  | 80  | 3046868 |
| LM44 | ERS762172 | CWMH01000001-CWMH01000050 | 164,75 | 50  | 3059781 |
| LM45 | ERS762173 | CWLN01000001-CWLN01000032 | 117,72 | 32  | 3025727 |
| LM46 | ERS762174 | CWLF01000001-CWLF01000062 | 165,1  | 62  | 3063204 |
| LM47 | ERS762175 | CWKO01000001-CWKO01000098 | 125,37 | 98  | 3036659 |
| LM48 | ERS762176 | CWLM01000001-CWLM01000093 | 190    | 93  | 3102890 |
| LM49 | ERS762177 | CWLC01000001-CWLC01000049 | 196,55 | 49  | 3091729 |
| LM50 | ERS762178 | CWMK01000001-CWMK01000247 | 144,1  | 247 | 3120646 |
| LM51 | ERS762179 | CWMM01000001-CWMM01000277 | 117,02 | 277 | 3093071 |
| LM53 | ERS762181 | CWMN01000001-CWMN01000287 | 181,29 | 287 | 3084962 |
| LM56 | ERS762184 | CWMP01000001-CWMP01000300 | 120,23 | 300 | 3071098 |
| LM58 | ERS762186 | CWMS01000001-CWMS01000173 | 189,52 | 173 | 3060480 |
| LM59 | ERS762187 | CWMT01000001-CWMT01000295 | 164,32 | 295 | 3137346 |
| LM60 | ERS762188 | CWMW01000001-CWMW01000402 | 154,23 | 402 | 3236153 |
| LM61 | ERS762189 | CWMU01000001-CWMU01000166 | 168,52 | 166 | 3025645 |
| LM63 | ERS762191 | CWMY01000001-CWMY01000328 | 154,33 | 328 | 3057069 |
| LM64 | ERS762192 | CWMQ01000001-CWMQ01000197 | 170,33 | 197 | 3090863 |

|      |           |                           |        |     |         |
|------|-----------|---------------------------|--------|-----|---------|
| LM65 | ERS762193 | CWMV01000001-CWMV01000143 | 153,65 | 143 | 3093004 |
| LM66 | ERS762194 | CWNE01000001-CWNE01000217 | 158,34 | 213 | 3113119 |
| LM67 | ERS762195 | CWNF01000001-CWNF01000334 | 187,63 | 334 | 3182476 |
| LM68 | ERS762196 | CWMZ01000001-CWMZ01000157 | 162,18 | 157 | 3042254 |
| LM69 | ERS762197 | CWNB01000001-CWNB01000175 | 169,69 | 175 | 3065208 |
| LM70 | ERS762198 | CWNH01000001-CWNH01000411 | 136,59 | 411 | 3167720 |
| LM71 | ERS762199 | CWND01000001-CWND01000201 | 178,82 | 201 | 3115096 |
| LM72 | ERS762200 | CWNI01000001-CWNI01000367 | 202,18 | 367 | 3153823 |
| LM73 | ERS762201 | CWNA01000001-CWNA01000142 | 177,81 | 142 | 3061558 |
| LM74 | ERS762202 | CWNG01000001-CWNG01000399 | 157,68 | 399 | 3182521 |

---

<sup>a</sup>Large contigs size is >1000 bp

TABLE S4 Source and typing details of isolates considered for phylogenetic analysis

| <b>Study ID</b> | <b>Year</b> | <b>Plant ID</b> | <b>PFGE<sup>a</sup></b> | <b>Lineage</b> | <b>Sequence Type</b> |
|-----------------|-------------|-----------------|-------------------------|----------------|----------------------|
| LM1             | 2012        | A               | AS28_AP13               | II             | 14                   |
| LM2             | 2012        | B               | AS09_AP15               | II             | 9                    |
| LM3             | 2012        | B               | AS09_AP15               | II             | 9                    |
| LM4             | 2012        | C               | AS25_AP51               | II             | 121                  |
| LM5             | 2012        | D               | AS45_AP11               | I              | 3                    |
| LM6             | 2012        | E               | AS09_AP15               | II             | 9                    |
| LM7             | 2012        | F               | AS09_AP15               | II             | 9                    |
| LM8             | 2012        | G               | AS09_AP15               | II             | 9                    |
| LM9             | 2012        | G               | AS09_AP15               | II             | 9                    |
| LM10            | 2012        | F               | AS09_AP15               | II             | 9                    |
| LM11            | 2012        | F               | AS28_AP13               | II             | 14                   |
| LM12            | 2012        | F               | AS28_AP13               | II             | 14                   |
| LM13            | 2012        | H               | AS09_AP15               | II             | 9                    |
| LM14            | 2012        | I               | AS09_AP50               | II             | 9                    |
| LM15            | 2012        | I               | AS09_AP15               | II             | 9                    |
| LM16            | 2012        | J               | AS09_AP15               | II             | 9                    |
| LM17            | 2013        | K               | AS23_AP09               | II             | 121                  |
| LM18            | 2013        | K               | AS23_AP09               | II             | 121                  |
| LM19            | 2013        | K               | AS23_AP09               | II             | 121                  |
| LM20            | 2013        | K               | AS74_AP09               | II             | 121                  |
| LM21            | 2012        | L               | AS09_AP15               | II             | 9                    |
| LM22            | 2012        | L               | AS09_AP15               | II             | 9                    |
| LM23            | 2012        | M               | AS23_AP09               | II             | 121                  |
| LM24            | 2012        | M               | AS23_AP02               | II             | 121                  |
| LM25            | 2012        | N               | AS23_AP09               | II             | 121                  |
| LM26            | 2012        | N               | AS57_AP42               | I              | 2                    |
| LM27            | 2012        | N               | AS57_AP05               | I              | 2                    |
| LM28            | 2012        | O               | AS57_AP04               | I              | 2                    |
| LM29            | 2012        | O               | AS57_AP04               | I              | 2                    |
| LM30            | 2012        | P               | AS23_AP10               | II             | 121                  |
| LM31            | 2012        | P               | AS23_AP10               | II             | 121                  |
| LM32            | 2012        | D               | AS23_AP01               | II             | 121                  |
| LM33            | 2012        | D               | AS44_AP16               | I              | 3                    |
| LM34            | 2012        | D               | AS23_AP10_              | II             | 121                  |
| LM35            | 2012        | D               | AS09_AP15               | II             | 9                    |
| LM36            | 2012        | D               | AS45_AP16               | I              | 3                    |
| LM37            | 2012        | D               | AS23_AP01               | II             | 121                  |
| LM38            | 2012        | D               | AS09_AP15               | II             | 9                    |
| LM39            | 2012        | D               | AS23_AP01               | II             | 121                  |
| LM40            | 2012        | D               | AS44_AP16               | I              | 3                    |

|      |      |                |           |    |     |
|------|------|----------------|-----------|----|-----|
| LM41 | 2012 | D              | AS44_AP16 | I  | 3   |
| LM42 | 2012 | D              | AS09_AP15 | II | 9   |
| LM43 | 2012 | Q              | AS09_AP15 | II | 9   |
| LM44 | 2012 | Q              | AS09_AP15 | II | 9   |
| LM45 | 2012 | Q              | AS09_AP15 | II | 9   |
| LM46 | 2012 | Q              | AS09_AP15 | II | 9   |
| LM47 | 2012 | Q              | AS57_AP07 | I  | 2   |
| LM48 | 2012 | R              | AS44_AP19 | I  | 3   |
| LM49 | 2012 | R              | AS44_AP19 | I  | 3   |
| LM50 | 2012 | S <sup>b</sup> | AS44_AP16 | I  | 3   |
| LM51 | 2013 | S <sup>b</sup> | AS43_AP06 | I  | 3   |
| LM53 | 2014 | T <sup>b</sup> | AS09_AP15 | II | 9   |
| LM56 | 2014 | T <sup>b</sup> | AS31_AP14 | II | 101 |
| LM58 | 2014 | T <sup>b</sup> | AS31_AP14 | II | 101 |
| LM59 | 2014 | T <sup>b</sup> | AS09_AP15 | II | 9   |
| LM60 | 2014 | T <sup>b</sup> | AS09_AP15 | II | 9   |
| LM61 | 2014 | T <sup>b</sup> | AS09_AP15 | II | 9   |
| LM63 | 2014 | U <sup>b</sup> | AS28_AP13 | II | 14  |
| LM64 | 2014 | U <sup>b</sup> | AS25_AP08 | II | 121 |
| LM65 | 2014 | U <sup>b</sup> | AS25_AP08 | II | 121 |
| LM66 | 2012 | Z <sup>b</sup> | AS05_AP17 | II | 8   |
| LM67 | 2011 | V <sup>b</sup> | AS05_AP17 | II | 8   |
| LM68 | 2011 | V <sup>b</sup> | AS05_AP17 | II | 8   |
| LM69 | 2011 | V <sup>b</sup> | AS05_AP17 | II | 8   |
| LM70 | 2013 | Z <sup>b</sup> | AS05_AP17 | II | 8   |
| LM71 | 2013 | Z <sup>b</sup> | AS05_AP17 | II | 8   |
| LM72 | 2013 | S <sup>b</sup> | AS44_AP16 | I  | 3   |
| LM73 | 2013 | S <sup>b</sup> | AS44_AP16 | I  | 3   |
| LM74 | 2013 | S <sup>b</sup> | AS31_AP14 | II | 101 |

<sup>a</sup>PFGE Genotype was determined with AscI (AS) and ApaI enzymes (AP).

<sup>b</sup>Case plant

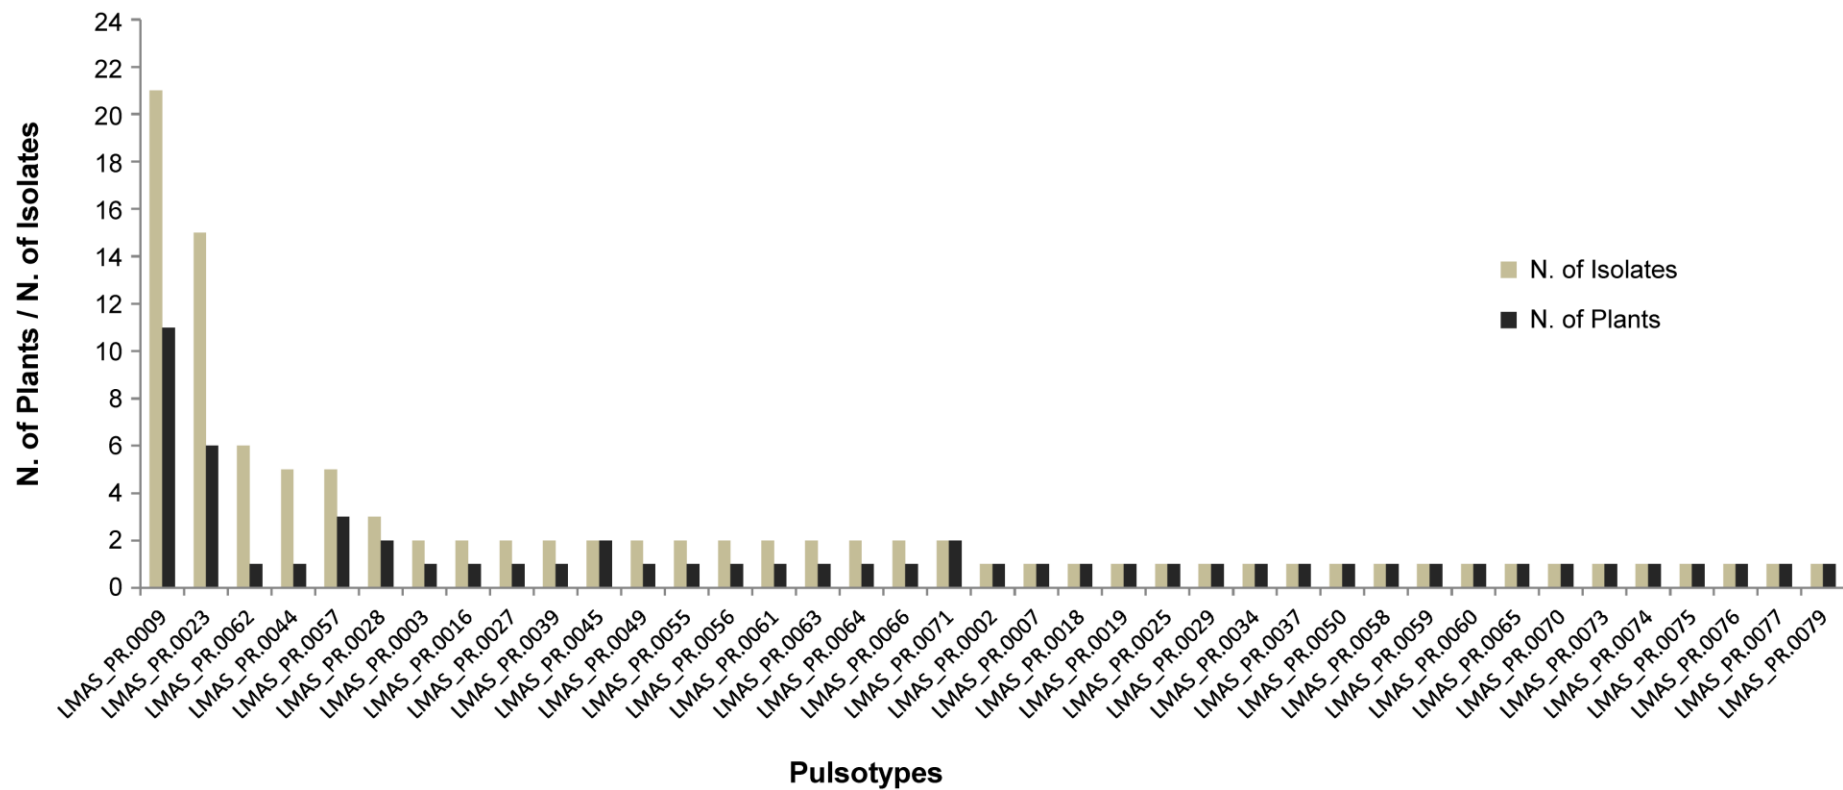

FIG S1 Distribution among the surveyed plants of the 39 *AscI*-PFGE types identified in the isolates of the study surveys
